# Supplementary material for: Controlled synthesis of 3D hierarchical NiSe microspheres for high-performance supercapacitor design
Source: Royal Society of Chemistry journal article supplement (doi:10.1039/c6ra06909f), 2016-01-01
Supplement: c6ra06909f1.pdf [file c6ra06909f1.pdf]

## Controlled Synthesis of 3D Hierarchically NiSe Microspheres for High-performance Supercapacitor Design

Kailu Guo,<sup>a</sup> Feifei Yang,<sup>b</sup> Shizhong Cui,<sup>a</sup> Weihua Chen,<sup>b,\*</sup> and Liwei Mi<sup>a,\*</sup>

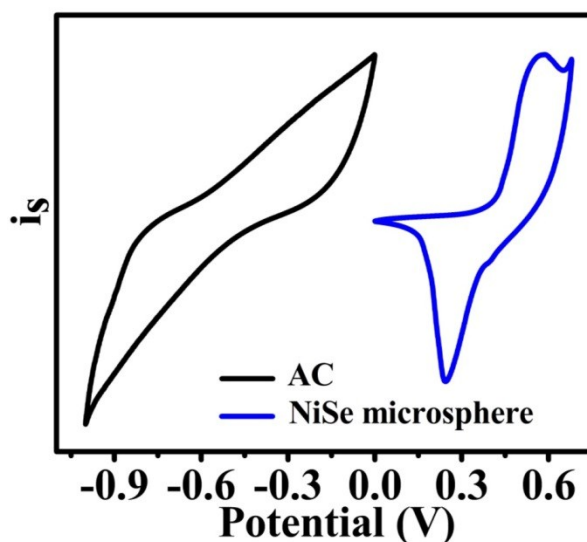

**Figure S1** Normalized CV curves of AC and NiSe microspheres at the scan rate of 5 mV s<sup>-1</sup>

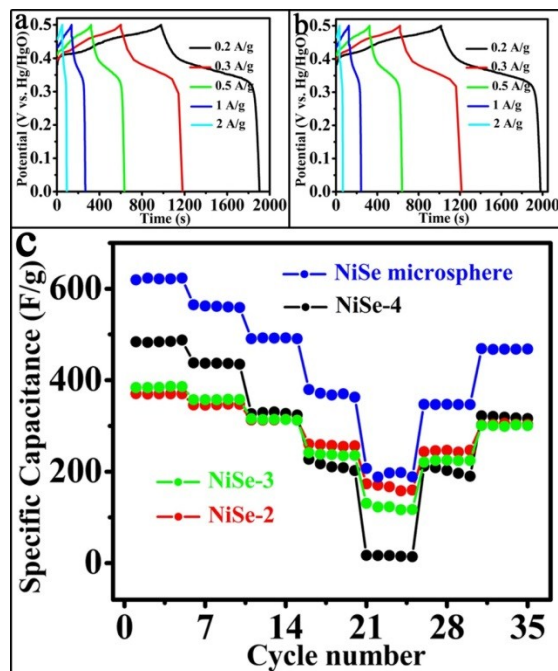

**Figure S2** (a and b) The galvanostatic charge-discharge curves of NiSe-2 and NiSe-3 at various current densities respectively; (c) Discharge specific capacitance curves of NiSe-2, NiSe-3, NiSe-4 and NiSe microspheres
